# Supplementary material
Source: PubMed Central journal article supplement (PMC2479068)
Supplement: 10.3163.1536-5050.96.3.007.sg002.pdf [file 10.3163.1536-5050.96.3.007.sg002.pdf]

**Measuring medical student preference: a comparison of classroom versus online instruction for  
teaching PubMed**

**Laura M. Schimming, MLS**

**APPENDIX B**

Open-ended student feedback form

(Presented to all students)

Please submit your overall suggestions and comments for this training:
