# Supplementary material
Source: PubMed Central journal article supplement (PMC2479068)
Supplement: 10.3163.1536-5050.96.3.007.sg003.pdf [file 10.3163.1536-5050.96.3.007.sg003.pdf]

**Measuring medical student preference: a comparison of classroom versus online instruction for teaching PubMed**

**Laura M. Schimming, MLS**

**APPENDIX C**

**Anonymous student feedback form about the online tutorial (presented to classes of 2007, 2008, and 2009)**

I would have preferred to learn about PubMed through an in-class training session led by an instructor (not online):

- a. Agree
- b. Disagree
- c. Neutral

I found the tutorial well organized and easy to navigate.

- a. Agree
- b. Disagree
- c. Neutral

I spent the following amount of time reviewing the online tutorial:

- a. 5–10 minutes
- b. 10–30 minutes
- c. 20 minutes–1 hour
- d. Over 1 hour
- e. I did not look at the online tutorial

The online training increased my knowledge of PubMed.

- a. Agree
- b. Disagree
- c. Neutral
